# Supplementary material
Source: Copernicus journal article supplement (doi:10.5194/egusphere-2026-2405)
Supplement: Supplementary file 1 [file egusphere-2026-2405-supplement.pdf]

## Supplement

Unveiling the multiphase fate of 2,4-dinitrophenol on aerosols: Interfacial hydration governs competing oxidation pathways and unexpected toxicity amplification

Chenlei Wang<sup>1</sup>, Ran Li<sup>1</sup>, Jiaying Sun<sup>2</sup>, Zihan Zhang<sup>1</sup>, Nan Zhao<sup>1</sup>, Leilei Liu<sup>\*1</sup>, Zuju

Ma<sup>1</sup>, Maoxia He<sup>3</sup>, Jianfei Sun<sup>\*1</sup>

<sup>1</sup>School of Environmental and Material Engineering, Yantai University,

Yantai 264005, P. R. China

<sup>2</sup>Shandong Pengbo Safety & Environmental Services Limited, Yantai 265600, P. R.

China

<sup>3</sup>Environment Research Institute, Shandong University,

Qingdao 266237, P. R. China

**Table S1** The reaction energies ( $\Delta_r E$ ) of 2,4-DNP +  $\cdot\text{OH} \rightarrow \text{IM3}$  at various levels of theory. Units of is kcal mol<sup>-1</sup>.

| Methods                | $\Delta_r E(\text{kcal mol}^{-1})$ | Note               |
|------------------------|------------------------------------|--------------------|
| CCSD(T)/6-31+g(d,p)    | -17.11                             |                    |
| M062x/6-311++g(3df,2p) | -18.28                             | ZPEs from          |
| M062X/def2-TZVP        | -18.73                             | M06-2X/6-31+g(d,p) |
| M062X/aug-cc-pVDZ      | -19.50                             |                    |

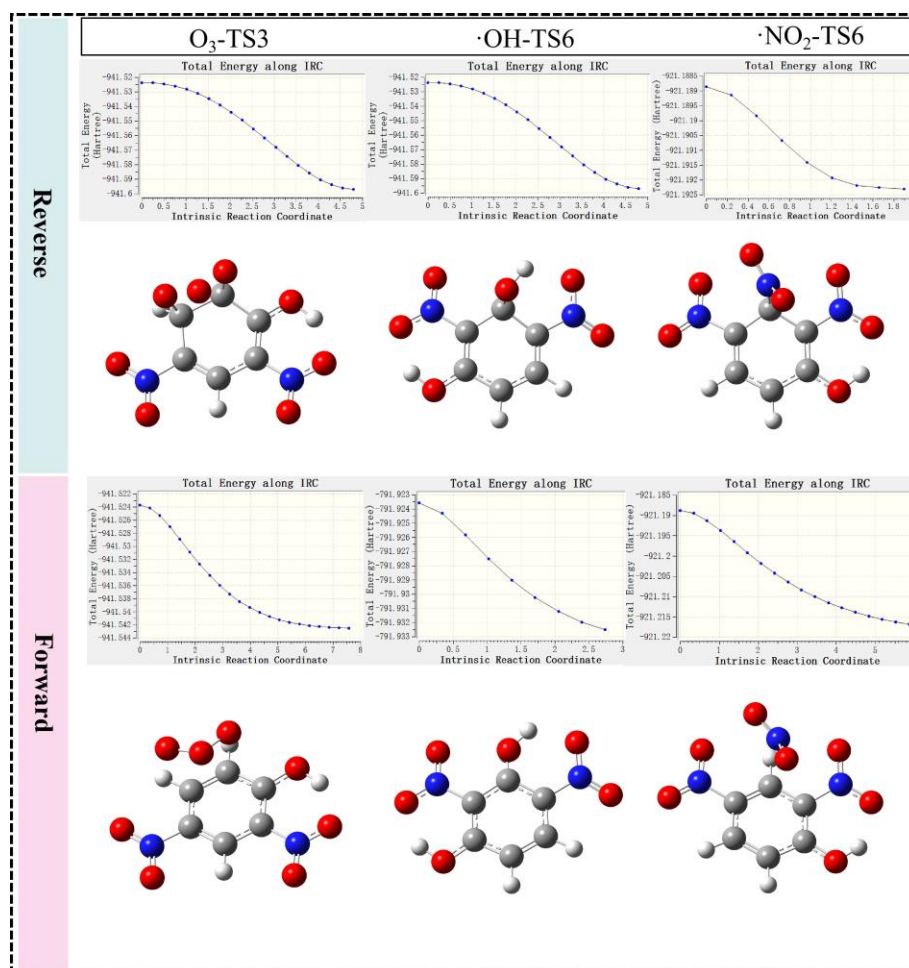

**Figure S1** The IRC analysis of important transition states.

**Table S2** The total rate constants ( $\text{cm}^3 \text{ molecule}^{-1} \text{ s}^{-1}$ ) of 2,4-DNP with  $\text{O}_3$ ,  $\bullet\text{OH}$ ,  $\bullet\text{NO}_2$  in the gas phase and aqueous phase

| T(K) | Phase                  | $k\text{-O}_3$         | $k\text{-}\bullet\text{OH}$ | $k\text{-}\bullet\text{NO}_2$ |
|------|------------------------|------------------------|-----------------------------|-------------------------------|
| 200  | Gas                    | $1.78 \times 10^{-26}$ | $2.87 \times 10^{-16}$      | $5.37 \times 10^{-35}$        |
| 225  |                        | $2.36 \times 10^{-25}$ | $6.13 \times 10^{-16}$      | $8.12 \times 10^{-33}$        |
| 250  |                        | $1.92 \times 10^{-24}$ | $1.16 \times 10^{-15}$      | $4.65 \times 10^{-31}$        |
| 275  |                        | $1.09 \times 10^{-23}$ | $2.02 \times 10^{-15}$      | $1.31 \times 10^{-29}$        |
| 300  |                        | $4.72 \times 10^{-23}$ | $3.30 \times 10^{-15}$      | $2.16 \times 10^{-28}$        |
| 325  |                        | $1.66 \times 10^{-22}$ | $5.10 \times 10^{-15}$      | $2.36 \times 10^{-27}$        |
| 350  |                        | $4.97 \times 10^{-22}$ | $7.55 \times 10^{-15}$      | $1.87 \times 10^{-26}$        |
| 375  |                        | $1.30 \times 10^{-21}$ | $1.08 \times 10^{-14}$      | $1.14 \times 10^{-25}$        |
| 400  |                        | $3.07 \times 10^{-21}$ | $1.50 \times 10^{-14}$      | $6.99 \times 10^{-38}$        |
| 200  |                        | Aqueous                | $1.38 \times 10^{-21}$      | $6.26 \times 10^{-22}$        |
| 225  | $4.02 \times 10^{-20}$ |                        | $2.09 \times 10^{-20}$      | $5.76 \times 10^{-32}$        |
| 250  | $6.05 \times 10^{-19}$ |                        | $3.54 \times 10^{-19}$      | $8.35 \times 10^{-30}$        |
| 275  | $5.63 \times 10^{-18}$ |                        | $3.65 \times 10^{-18}$      | $5.35 \times 10^{-28}$        |
| 300  | $3.65 \times 10^{-17}$ |                        | $2.60 \times 10^{-17}$      | $1.82 \times 10^{-26}$        |
| 325  | $1.79 \times 10^{-16}$ |                        | $1.39 \times 10^{-16}$      | $3.79 \times 10^{-25}$        |
| 350  | $7.05 \times 10^{-16}$ |                        | $5.90 \times 10^{-16}$      | $5.31 \times 10^{-24}$        |
| 375  | $2.33 \times 10^{-15}$ |                        | $2.09 \times 10^{-15}$      | $5.38 \times 10^{-23}$        |
| 400  | $6.70 \times 10^{-15}$ |                        | $6.39 \times 10^{-15}$      | $6.99 \times 10^{-38}$        |

**Table S3** The experimental rate constant ( $\text{cm}^3 \text{ molecule}^{-1} \text{ s}^{-1}$ ) values of various phenols with  $\bullet\text{OH}$  in the gas phase.

| Compound    | Structure formula                                                                   | Rate constants                                  |
|-------------|-------------------------------------------------------------------------------------|-------------------------------------------------|
| 2,4DNP      | 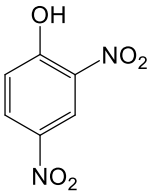   | $2.91 \times 10^{-12}$                          |
| Nitrophenol |    | $1.99 \times 10^{-11}$ <small>错误!未定义书签。</small> |
| Phenol      |    | $2.30 \times 10^{-11}$                          |
| Catechol    |  | $1.04 \times 10^{-10}$                          |



**Table S4** The Ames mutagenicity, development toxicity for 2,4-DNP and the intermediates (IMs series) and final products (Ps series).

| Compound | Ames muagenicity | Developmental toxicity |
|----------|------------------|------------------------|
| 2,4DNP   | 0.13             | 0.55                   |
| IM17     | 0                | 0.67                   |
| IM25     | 0                | 0.85                   |
| IM44     | 0                | 0.84                   |
| IM54     | 0                | 0.94                   |
| P1       | 0.53             | 0.58                   |
| P2       | 0.21             | 0.56                   |
| P3       | 0.47             | 0.65                   |
| P4       | 0.21             | 0.56                   |

Note: Ames mutagenicity negative: Ames mutagenicity  $\leq 0.50$ , Ames mutagenicity positive: Ames mutagenicity  $> 0.50$ . Development non-toxicant: developmental toxicity  $< 0.50$ , development toxicant: development toxicity  $> 0.50$ .
